# Supplementary material
Source: Springer Nature journal article supplement (https://www.springermedizin.de/resource/supplementary/12885_2010_2289_MOESM11_ESM.pdf/9460948)

### Microarray

### Real Time-PCR

### Microarray

### Real Time-PCR

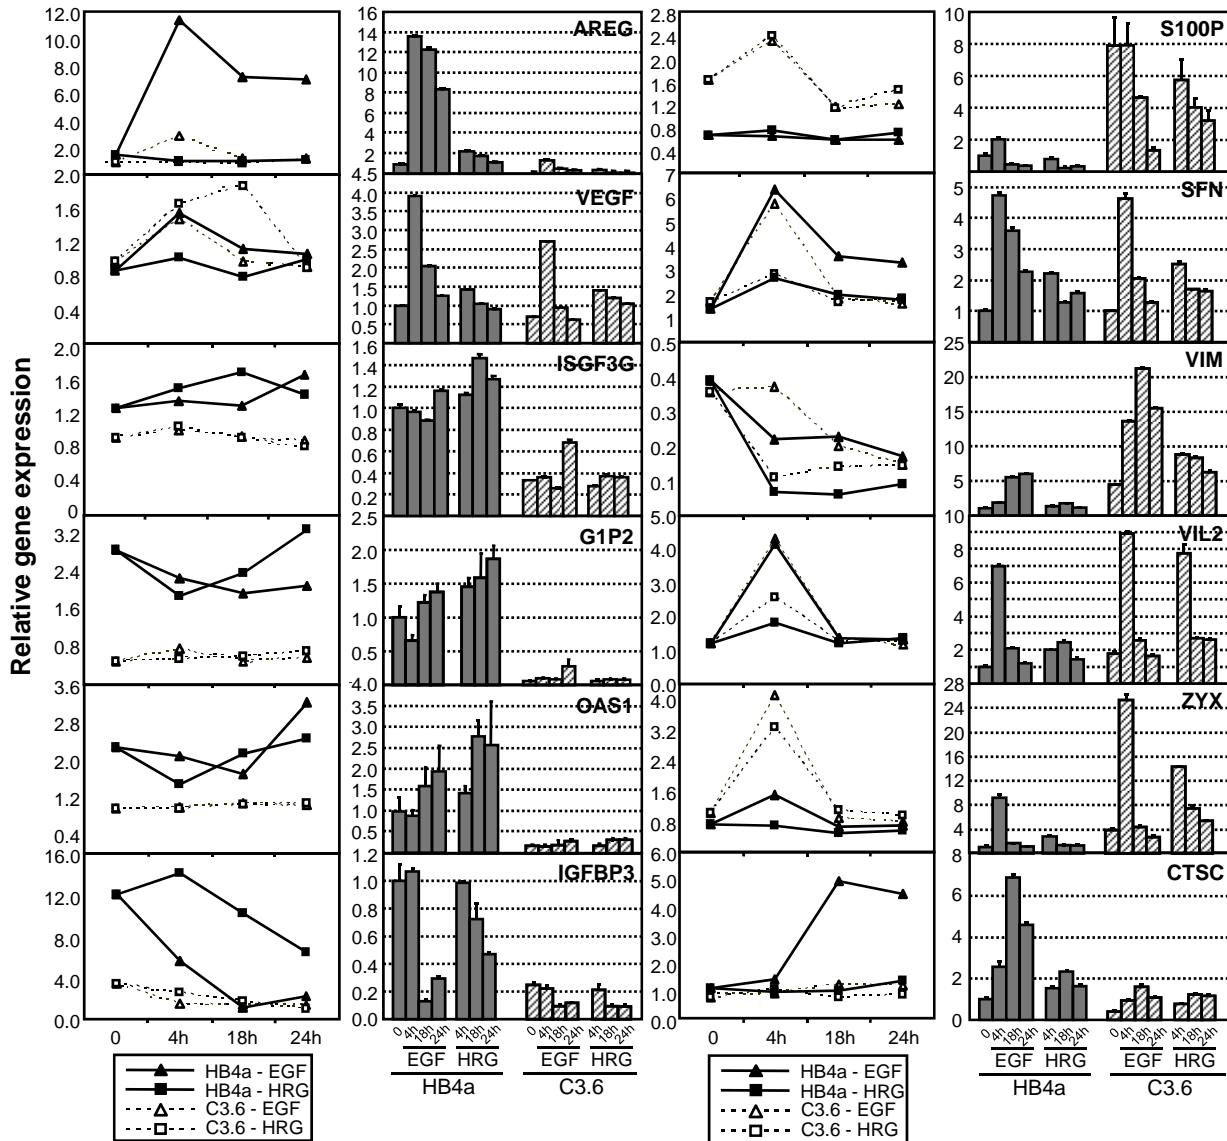

Supplement: MOESM11 [file 9460948]
